# Supplementary material
Source: ML conference proceedings conference paper supplement (https://proceedings.neurips.cc/paper_files/paper/2007/hash/42e77b63637ab381e8be5f8318cc28a2-Abstract.html)
Supplement: Supplementary file [file 42e77b63637ab381e8be5f8318cc28a2-Supplemental.zip]

## A Proof of Theorem 1

The proof of Theorem 1 makes use of the following simple inequality which is straight-forward to prove <sup>6</sup>. For any hypotheses  $h, h' \in \mathcal{H}$ ,

$$|\epsilon_S(h, h') - \epsilon_T(h, h')| \leq \frac{1}{2} d_{\mathcal{H}\Delta\mathcal{H}}(\mathcal{D}_S, \mathcal{D}_T).$$

The proof also relies heavily on the triangle inequality for classification error [3, 8] which implies that for any labeling functions  $f_1, f_2$ , and  $f_3$ ,  $\epsilon_S(f_1, f_2) \leq \epsilon_S(f_1, f_3) + \epsilon_S(f_2, f_3)$ . Similarly, for the target domain, for any  $f_1, f_2$ , and  $f_3$ ,  $\epsilon_T(f_1, f_2) \leq \epsilon_T(f_1, f_3) + \epsilon_T(f_2, f_3)$ .

$$\begin{aligned} \epsilon_T(h) &\leq \epsilon_T(h^*) + \epsilon_T(h, h^*) \leq \epsilon_T(h^*) + \epsilon_S(h, h^*) + |\epsilon_T(h, h^*) - \epsilon_S(h, h^*)| \\ &\leq \epsilon_T(h^*) + \epsilon_S(h, h^*) + \frac{1}{2} d_{\mathcal{H}\Delta\mathcal{H}}(\mathcal{D}_S, \mathcal{D}_T) \\ &\leq \epsilon_T(h^*) + \epsilon_S(h) + \epsilon_S(h^*) + \frac{1}{2} d_{\mathcal{H}\Delta\mathcal{H}}(\mathcal{D}_S, \mathcal{D}_T) \\ &= \epsilon_S(h) + \frac{1}{2} d_{\mathcal{H}\Delta\mathcal{H}}(\mathcal{D}_S, \mathcal{D}_T) + \lambda \\ &\leq \epsilon_S(h) + \frac{1}{2} \hat{d}_{\mathcal{H}\Delta\mathcal{H}}(\mathcal{U}_S, \mathcal{U}_T) + 4\sqrt{\frac{2d \log(2m') + \log(\frac{4}{\delta})}{m'}} + \lambda \end{aligned}$$

The last step in the proof is an application of Theorem 3.4 of Ben-David, Gehrke, and Kifer [4], together with the observation that since we can represent every  $g \in \mathcal{H}\Delta\mathcal{H}$  as a linear threshold network of depth 2 with 2 hidden units, the VC dimension of  $\mathcal{H}\Delta\mathcal{H}$  is at most twice the VC dimension of  $\mathcal{H}$  [1]. ■

## B Proof of the main theorem

### B.1 Proof of Lemma 1

This proof again relies heavily on the triangle inequality for classification error.

$$\begin{aligned} |\epsilon_\alpha(h) - \epsilon_T(h)| &= (1 - \alpha)|\epsilon_S(h) - \epsilon_T(h)| \\ &\leq (1 - \alpha)[|\epsilon_S(h) - \epsilon_S(h, h^*)| + |\epsilon_S(h, h^*) - \epsilon_T(h, h^*)| + |\epsilon_T(h, h^*) - \epsilon_T(h)|] \\ &\leq (1 - \alpha)[\epsilon_S(h^*) + |\epsilon_S(h, h^*) - \epsilon_T(h, h^*)| + \epsilon_T(h^*)] \\ &\leq (1 - \alpha)(\frac{1}{2} d_{\mathcal{H}\Delta\mathcal{H}}(\mathcal{D}_S, \mathcal{D}_T) + \lambda) \end{aligned}$$

■

### B.2 Proof of Lemma 2

We begin by restating Hoeffding's inequality.

#### Hoeffding's inequality

If  $X_1, X_2, \dots, X_n$  are independent and  $a_i \leq X_i \leq b_i$  ( $i = 1, 2, \dots, n$ ), then for  $\epsilon > 0$

$$\Pr[|\bar{X} - E[\bar{X}]| \geq \epsilon] \leq 2e^{-2n^2\epsilon^2 / \sum_{i=1}^n (b_i - a_i)^2},$$

where  $\bar{X} = (X_1 + \dots + X_n)/n$ .

Let  $X_1, \dots, X_{\beta m}$  be random variables that take on the values  $(\alpha/\beta)|h(x) - f_T(x)|$  for the  $\beta m$  instances  $x \in S_T$ . Similarly, let  $X_{\beta m+1}, \dots, X_m$  be random variables that take on the values

<sup>6</sup>Ben-David et al. [3] incorrectly stated this inequality in the original proof of Theorem 1. They wrote it using  $d_{\mathcal{H}}$  instead of  $\frac{1}{2} d_{\mathcal{H}\Delta\mathcal{H}}$ .

$(1-\alpha)/(1-\beta)|h(x)-f_S(x)|$  for the  $(1-\beta)m$  instances  $x \in S_S$ . Note that  $X_1, \dots, X_{\beta m} \in [0, \alpha/\beta]$  and  $X_{\beta m+1}, \dots, X_m \in [0, (1-\alpha)/(1-\beta)]$ . Then

$$\begin{aligned}\hat{\epsilon}_\alpha(h) &= \alpha \hat{\epsilon}_T(h) + (1-\alpha) \hat{\epsilon}_S(h) \\ &= \alpha \frac{1}{\beta m} \sum_{x \in S_T} |h(x) - f_T(x)| + (1-\alpha) \frac{1}{(1-\beta)m} \sum_{x \in S_S} |h(x) - f_S(x)| = \frac{1}{m} \sum_{i=1}^m X_i.\end{aligned}$$

Furthermore, by linearity of expectations

$$\begin{aligned}E[\hat{\epsilon}_\alpha(h)] &= \frac{1}{m} \left( \beta m \frac{\alpha}{\beta} \epsilon_T(h) + (1-\beta)m \frac{1-\alpha}{1-\beta} \epsilon_S(h) \right) \\ &= \alpha \epsilon_T(h) + (1-\alpha) \epsilon_S(h) = \epsilon_\alpha(h).\end{aligned}$$

So by Hoeffding's inequality the following holds for every  $h$ .

$$\begin{aligned}\Pr[|\hat{\epsilon}_\alpha(h) - \epsilon_\alpha(h)| \geq \epsilon] &\leq 2 \exp\left(\frac{-2m^2\epsilon^2}{\sum_{i=1}^m \text{range}^2(X_i)}\right) \\ &= 2 \exp\left(\frac{-2m^2\epsilon^2}{\beta m \left(\frac{\alpha}{\beta}\right)^2 + (1-\beta)m \left(\frac{1-\alpha}{1-\beta}\right)^2}\right) \\ &= 2 \exp\left(\frac{-2m\epsilon^2}{\frac{\alpha^2}{\beta} + \frac{(1-\alpha)^2}{1-\beta}}\right).\end{aligned}$$

The remainder of the proof for hypothesis classes of finite VC dimension follows a standard argument. In particular, the reduction to a finite hypothesis class using the growth function does not change [16, 1]. This, combined with the union bound, gives us the probability that there exists *any* hypothesis  $h \in \mathcal{H}$ ,  $|\hat{\epsilon}_\alpha(h) - \epsilon_\alpha(h)| \geq \epsilon$ . Substituting  $\delta$  for the probability and solving gives us

$$\epsilon = \sqrt{\left(\frac{\alpha^2}{\beta} + \frac{(1-\alpha)^2}{1-\beta}\right) \frac{d \log(2m) - \log \delta}{2m}}.$$

■

### B.3 Proof of Theorem 2

The proof follows the standard set of steps for proving learning bounds [1], using Lemma 1 to bound the difference between target and weighted errors and Lemma 2 for the uniform convergence of empirical and true weighted errors. Below we use L1, L2, and Thm1 to indicate that a line of the

proof follows by application of Lemma 1, Lemma 2, or Theorem 1 respectively.

$$\begin{aligned}
\epsilon_T(\hat{h}) &\leq \epsilon_\alpha(\hat{h}) + (1 - \alpha) \left( \frac{1}{2} d_{\mathcal{H}\Delta\mathcal{H}}(\mathcal{D}_S, \mathcal{D}_T) + \lambda \right) \quad (\text{L1}) \\
&\leq \hat{\epsilon}_\alpha(\hat{h}) + \sqrt{\frac{\alpha^2}{\beta} + \frac{(1 - \alpha)^2}{1 - \beta}} \sqrt{\frac{d \log(2m) - \log \delta}{2m}} + (1 - \alpha) \left( \frac{1}{2} d_{\mathcal{H}\Delta\mathcal{H}}(\mathcal{D}_S, \mathcal{D}_T) + \lambda \right) \quad (\text{L2}) \\
&\leq \hat{\epsilon}_\alpha(h_T^*) + \sqrt{\frac{\alpha^2}{\beta} + \frac{(1 - \alpha)^2}{1 - \beta}} \sqrt{\frac{d \log(2m) - \log \delta}{2m}} + (1 - \alpha) \left( \frac{1}{2} d_{\mathcal{H}\Delta\mathcal{H}}(\mathcal{D}_S, \mathcal{D}_T) + \lambda \right) \\
&\leq \epsilon_\alpha(h_T^*) + 2 \sqrt{\frac{\alpha^2}{\beta} + \frac{(1 - \alpha)^2}{1 - \beta}} \sqrt{\frac{d \log(2m) - \log \delta}{2m}} + (1 - \alpha) \left( \frac{1}{2} d_{\mathcal{H}\Delta\mathcal{H}}(\mathcal{D}_S, \mathcal{D}_T) + \lambda \right) \quad (\text{L2}) \\
&\leq \epsilon_T(h_T^*) + 2 \sqrt{\frac{\alpha^2}{\beta} + \frac{(1 - \alpha)^2}{1 - \beta}} \sqrt{\frac{d \log(2m) - \log \delta}{2m}} + 2(1 - \alpha) \left( \frac{1}{2} d_{\mathcal{H}\Delta\mathcal{H}}(\mathcal{D}_S, \mathcal{D}_T) + \lambda \right) \quad (\text{L1}) \\
&\leq \epsilon_T(h_T^*) + 2 \sqrt{\frac{\alpha^2}{\beta} + \frac{(1 - \alpha)^2}{1 - \beta}} \sqrt{\frac{d \log(2m) - \log \delta}{2m}} + \\
&\quad 2(1 - \alpha) \left( \frac{1}{2} d_{\mathcal{H}\Delta\mathcal{H}}(\mathcal{U}_S, \mathcal{U}_T) + 4 \sqrt{\frac{2d \log(2m') + \log(\frac{4}{\delta})}{m'}} + \lambda \right) \quad (\text{Thm 1})
\end{aligned}$$

■

### C Proof of Theorem 3

**Lemma 3** Let  $h$  be a hypothesis in class  $\mathcal{H}$ . Then  $|\epsilon_\alpha(h) - \epsilon_T(h)| \leq d_{\mathcal{H}\Delta\mathcal{H}}(\mathcal{D}_\alpha, \mathcal{D}_T) + \gamma_\alpha$ .

**Proof:**

$$\begin{aligned}
|\epsilon_\alpha(h) - \epsilon_T(h)| &\leq |[\epsilon_\alpha(h) - \epsilon_\alpha(h, h^*)] + [\epsilon_\alpha(h, h^*) - \epsilon_T(h, h^*)] + [\epsilon_T(h, h^*) - \epsilon_T(h)]| \\
&\leq [\epsilon_\alpha(h^*) + |\epsilon_\alpha(h, h^*) - \epsilon_T(h, h^*)| + \epsilon_T(h^*)] \\
&\leq \left( \frac{1}{2} d_{\mathcal{H}\Delta\mathcal{H}}(\mathcal{D}_\alpha, \mathcal{D}_T) + \gamma_\alpha \right)
\end{aligned}$$

■

**Lemma 4** Let  $\mathcal{H}$  be a hypothesis space of VC-dimension  $d$ . If a random labeled sample of size  $m$  is generated by drawing  $\beta_j m$  points from  $\mathcal{D}_j$ , and labeling them according to  $f_j$ , then with probability at least  $1 - \delta$  (over the choice of the samples), for every  $h \in \mathcal{H}$ :

$$|\hat{\epsilon}_\alpha(h) - \epsilon_\alpha(h)| < \sqrt{\sum_j \frac{\alpha_j^2}{\beta_j}} \sqrt{\frac{d \log(2m) - \log \delta}{2m}}$$

**Proof:** Because of its similarity to the proof of Lemma 2 (in Appendix B.2), we will omit some details of this proof. Let  $X_1, \dots, X_{\beta_j m}$  be random variables that take on the values  $(\alpha_j / \beta_j) |h(x) - f_j(x)|$  for the  $\beta_j m$  instances  $x \in S_j$ . Note that  $X_1, \dots, X_{\beta_j m} \in [0, \alpha_j / \beta_j]$ . Then

$$\hat{\epsilon}_\alpha(h) = \sum_{j=1}^N \alpha_j \hat{\epsilon}_j(h) = \sum_{j=1}^N \alpha_j \frac{1}{\beta_j m} \sum_{x \in S_j} |h(x) - f_j(x)| = \frac{1}{m} \sum_{i=1}^m X_i.$$

By linearity of expectations again, we have  $E[\hat{\epsilon}_\alpha(h)] = \epsilon_\alpha(h)$ .

By Hoeffding's inequality the following holds for every  $h$ .

$$\begin{aligned}\Pr [|\hat{\epsilon}_{\alpha}(h) - \epsilon_{\alpha}(h)| \geq \epsilon] &\leq 2 \exp \left( \frac{-2m^2\epsilon^2}{\sum_{i=1}^m \text{range}^2(X_i)} \right) \\ &= 2 \exp \left( \frac{-2m\epsilon^2}{\sum_j \frac{\alpha_j^2}{\beta_j}} \right).\end{aligned}$$

The remainder of the proof is identical to the proof of Lemma 2. ■

The proof of Theorem 3 combines Lemmas 3 and 4, following an identical argument to the proof of Theorem 2.
