# Supplementary material
Source: ML conference proceedings conference paper supplement (https://proceedings.neurips.cc/paper_files/paper/2007/hash/42e77b63637ab381e8be5f8318cc28a2-Abstract.html)
Supplement: Supplementary file [file 42e77b63637ab381e8be5f8318cc28a2-Supplemental.zip]

# Learning Bounds for Domain Adaptation [M27]

John Blitzer, Koby Crammer, Alex Kulesza, Fernando Pereira, Jenn Wortman  
University of Pennsylvania

**Setup:** **Plentiful but biased source data** and **relevant but scarce target data**

**Example task:** identifying genes in DNA sequences

**Domains:** different organisms

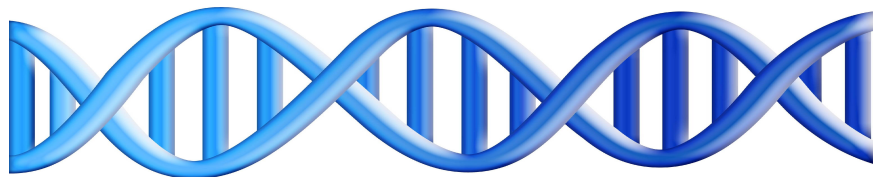

source

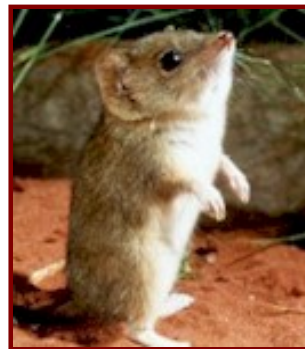

target

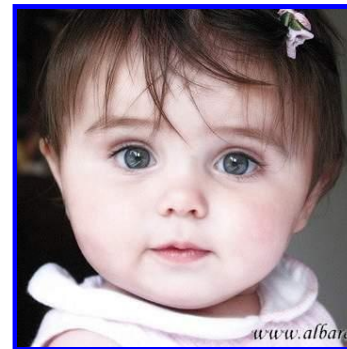

**We develop a uniform convergence bound that is computable from finite labeled & unlabeled samples**

**Minimize convex combinations of source & target risk**

**Generalizes standard single-domain bounds as well as previous domain adaptation bounds**
